# Supplementary material
Source: PubMed Central journal article supplement (PMC7348590)

# (a) Specimen comparisons

Plasma

WB (a)

WB (v)

Patient 1 D8

Patient 2 D24

Patient 3 D23

Patient 1 D27

Patient 4 D28

C  
G  
M

C  
G  
M

C  
G  
M

C  
G  
M

C  
G  
M

neg.  
neg.

pos.  
v weak.

pos.  
pos.

pos.  
neg.

pos.  
pos.

Specimen 1

Specimen 3

Specimen 5

Specimen 2

Specimen 12

*Tested at the point of care*

Serum

Patient 3 D19

Patient 4 D20

Patient 5 D24

Patient 6 D24

Patient 7 D29

C  
G  
M

C  
G  
M

C  
G  
M

C  
G  
M

C  
G  
M

pos.  
pos.

pos.  
pos.

pos.  
pos.

pos.  
pos.

pos.  
pos.

Specimen 4

Specimen 10

Specimen 18

Specimen 19

Specimen 21

# (b) Serial tests

## Serum

**Patient 8 D4**

**C**  
**G**  
**M**

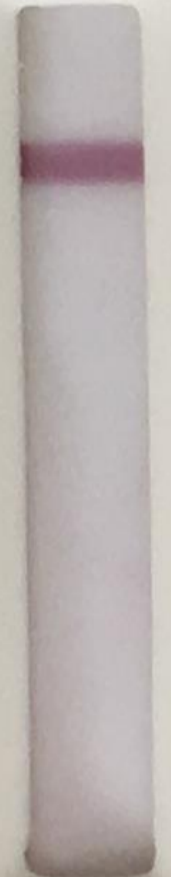

*neg.*  
*neg.*

*Specimen 22*

**Patient 8 D5**

**C**  
**G**  
**M**

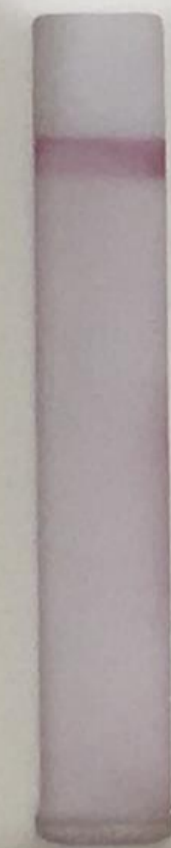

*neg.*  
*neg.*

*Specimen 23*

**Patient 8 D9**

**C**  
**G**  
**M**

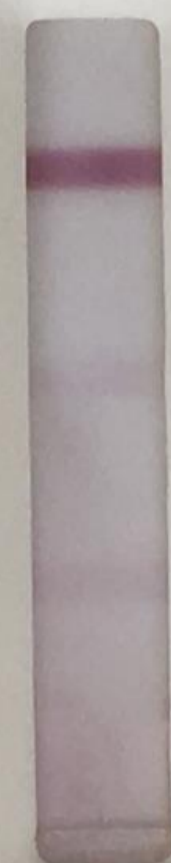

*w pos.*  
*w pos.*

*Specimen 24*

**Patient 8 D11**

**C**  
**G**  
**M**

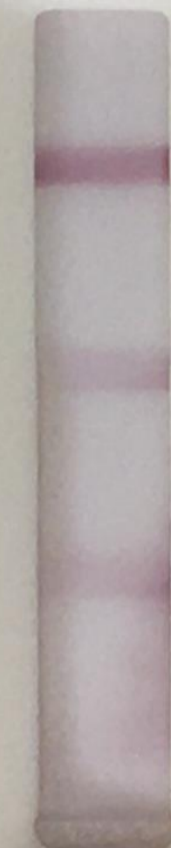

*pos.*  
*pos.*

*Specimen 25*

**Patient 8 D16**

**C**  
**G**  
**M**

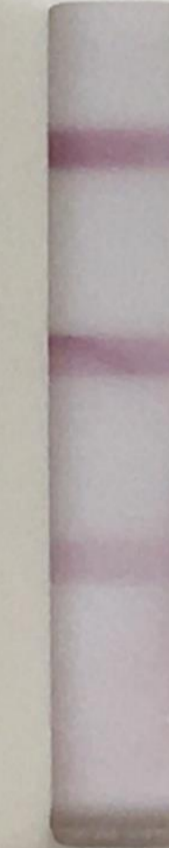

*pos.*  
*pos.*

*Specimen 28*

**Patient 29 D4**

**C**  
**G**  
**M**

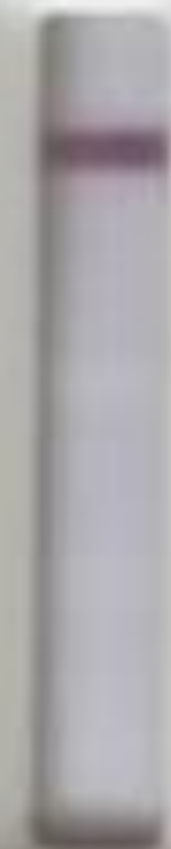

*neg.*  
*neg.*

*Specimen 49*

**Patient 29 D8**

**C**  
**G**  
**M**

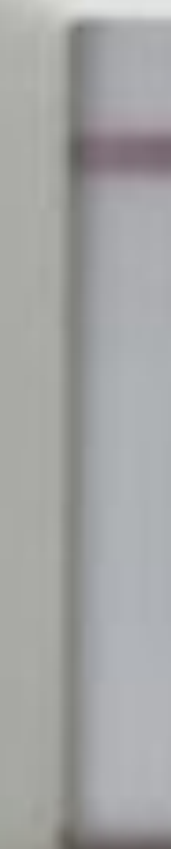

*neg.*  
*neg.*

*Specimen 50*

**Patient 29 D11**

**C**  
**G**  
**M**

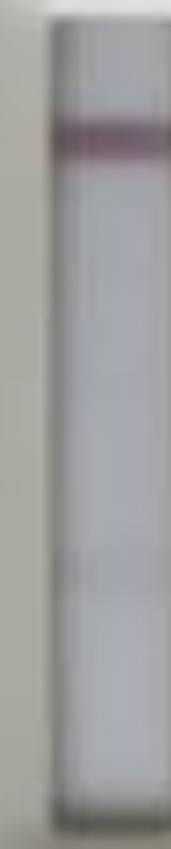

*neg.*  
*w pos.*

*Specimen 51*

**Patient 29 D18**

**C**  
**G**  
**M**

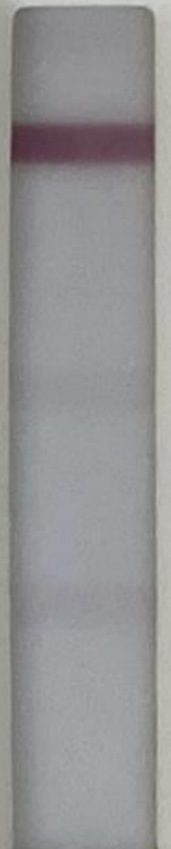

*w pos.*  
*pos.*

*Specimen 52*

# (c) Mild febrile patients (patient 9 – 18)

## Serum

**Patient 9 D41**

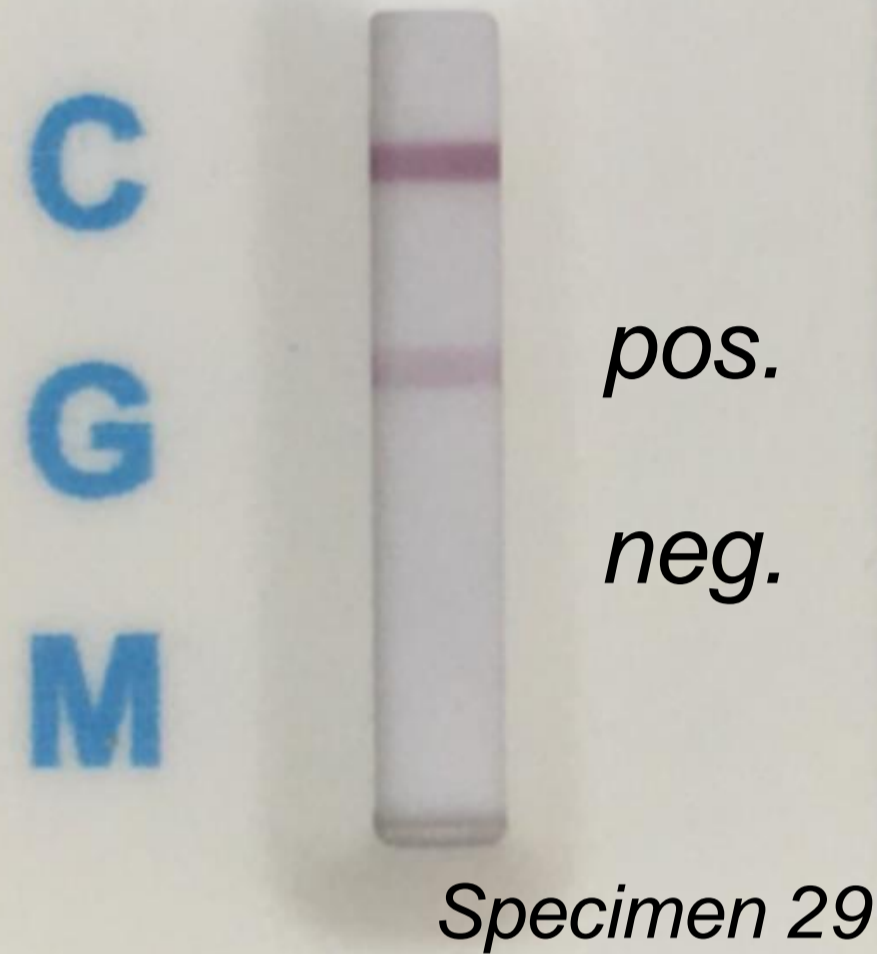

**Patient 10 D38**

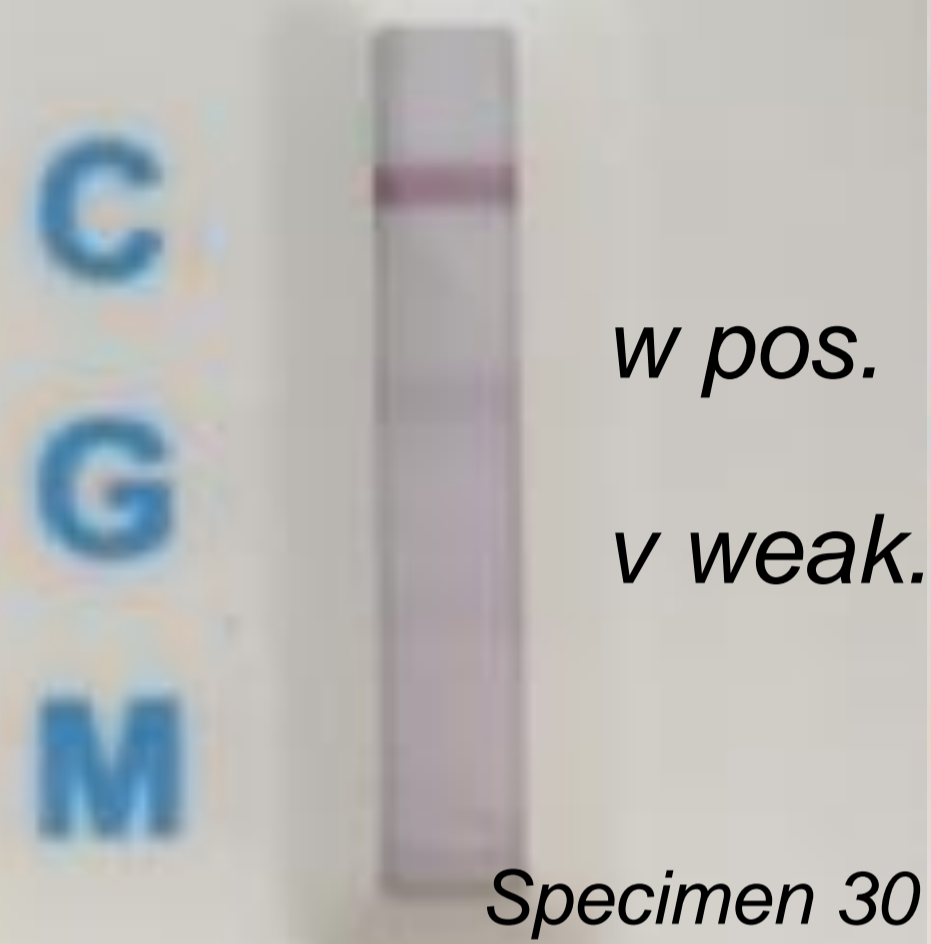

**Patient 11 D27**

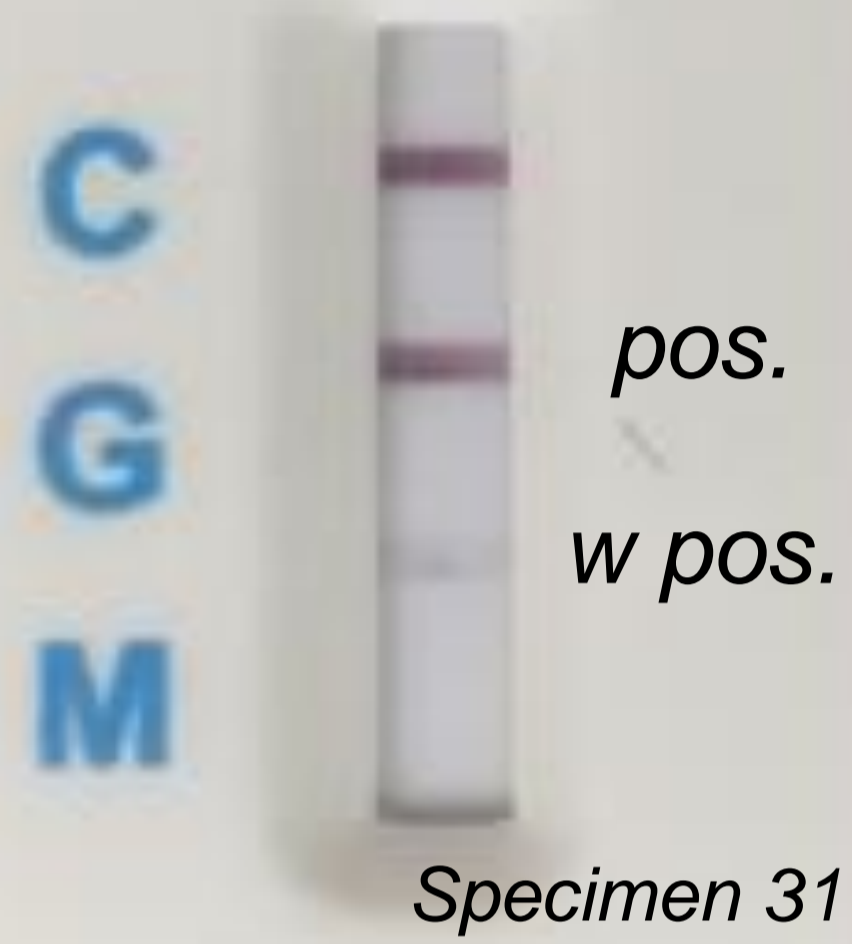

**Patient 12 D37**

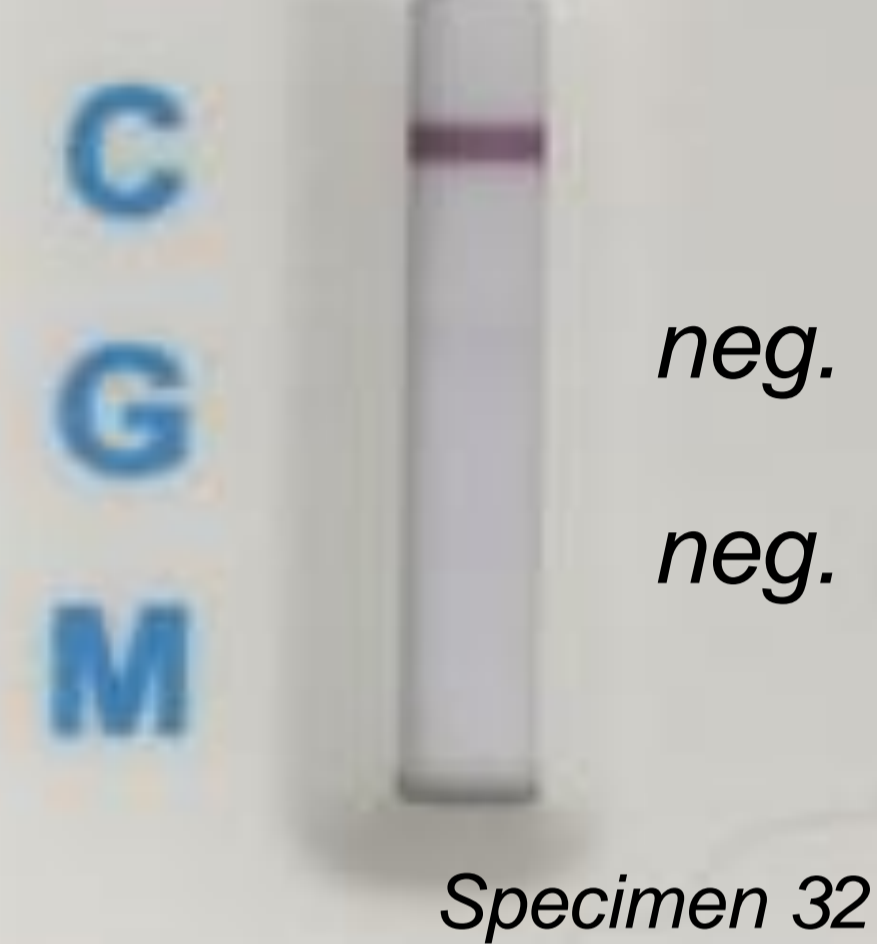

**Patient 13 D35**

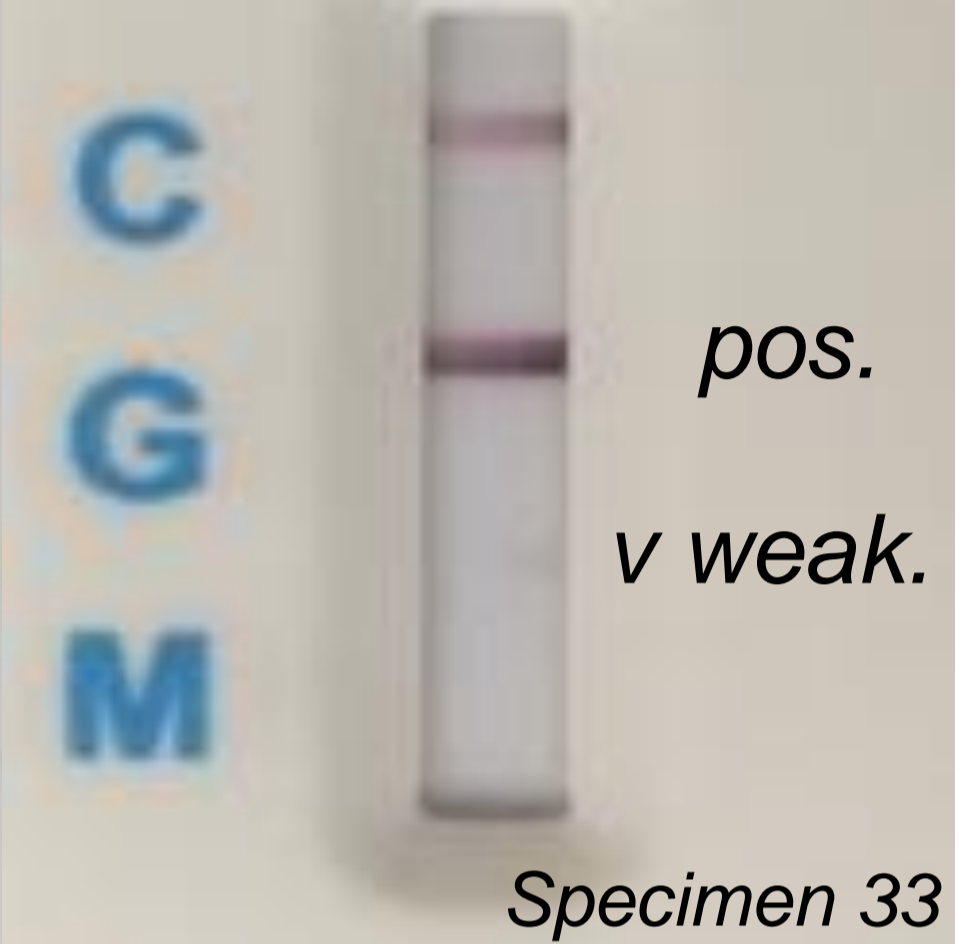

**Patient 14 D40**

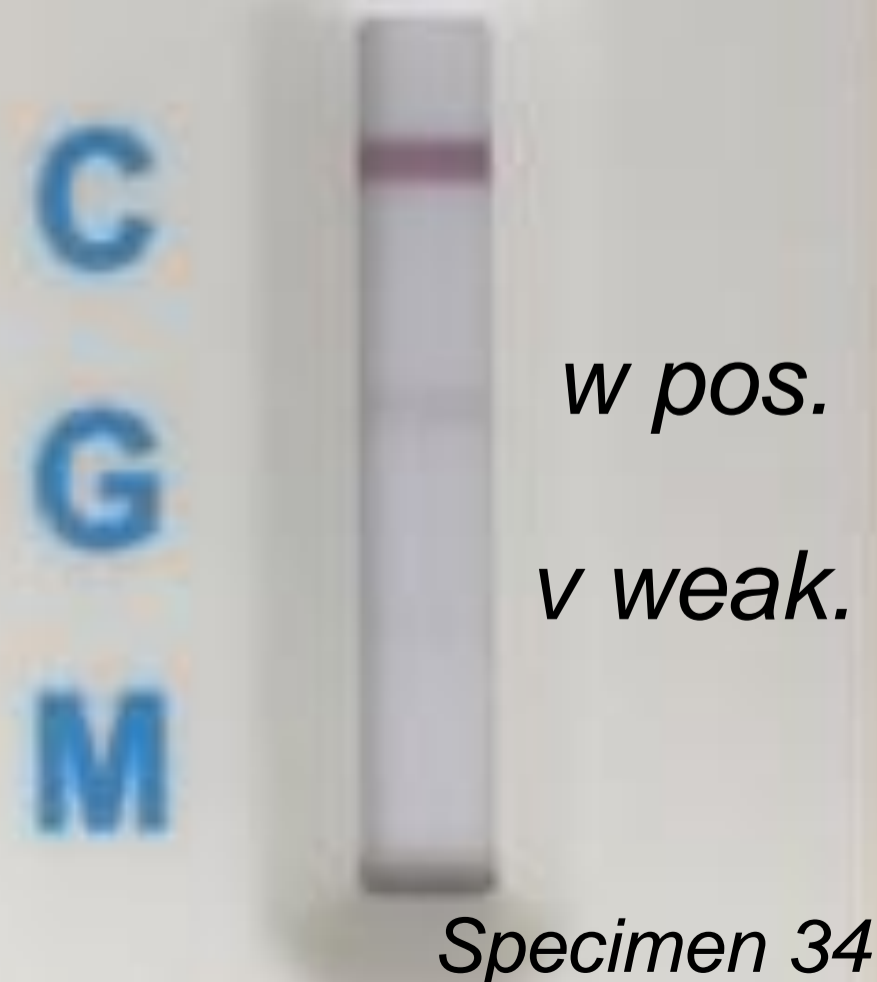

**Patient 15 D40**

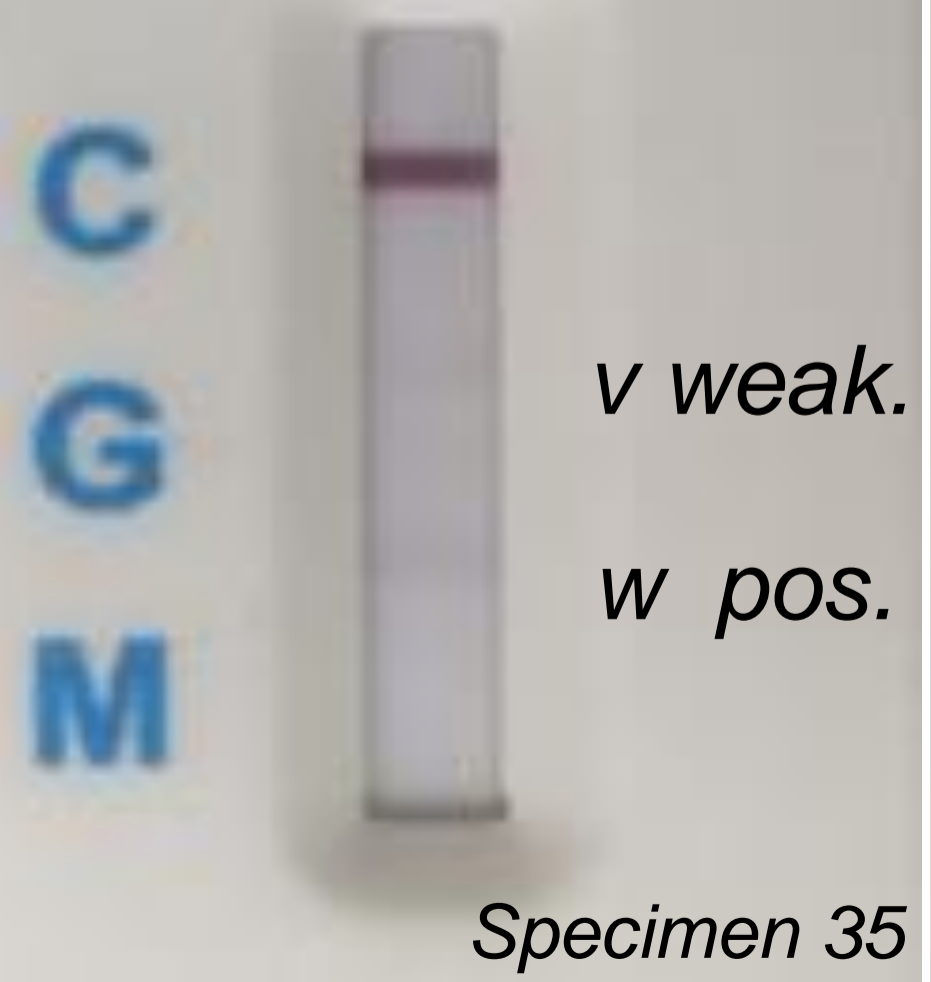

**Patient 16 D29**

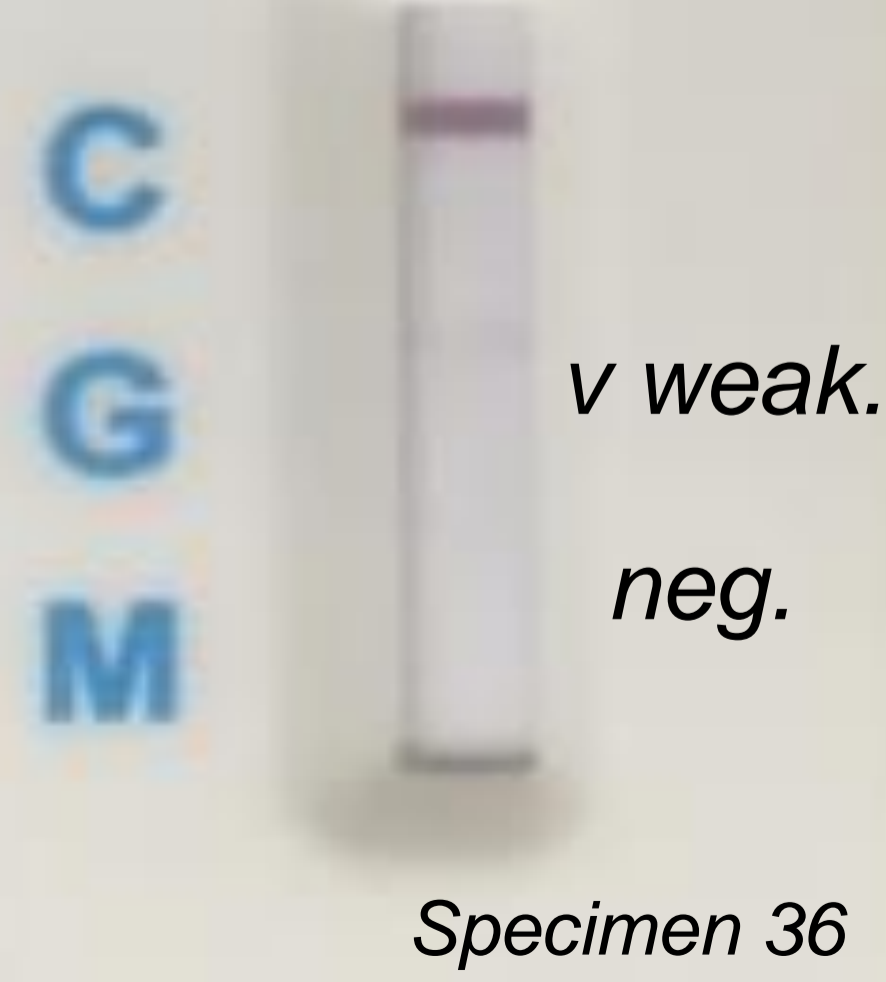

**Patient 17 D41**

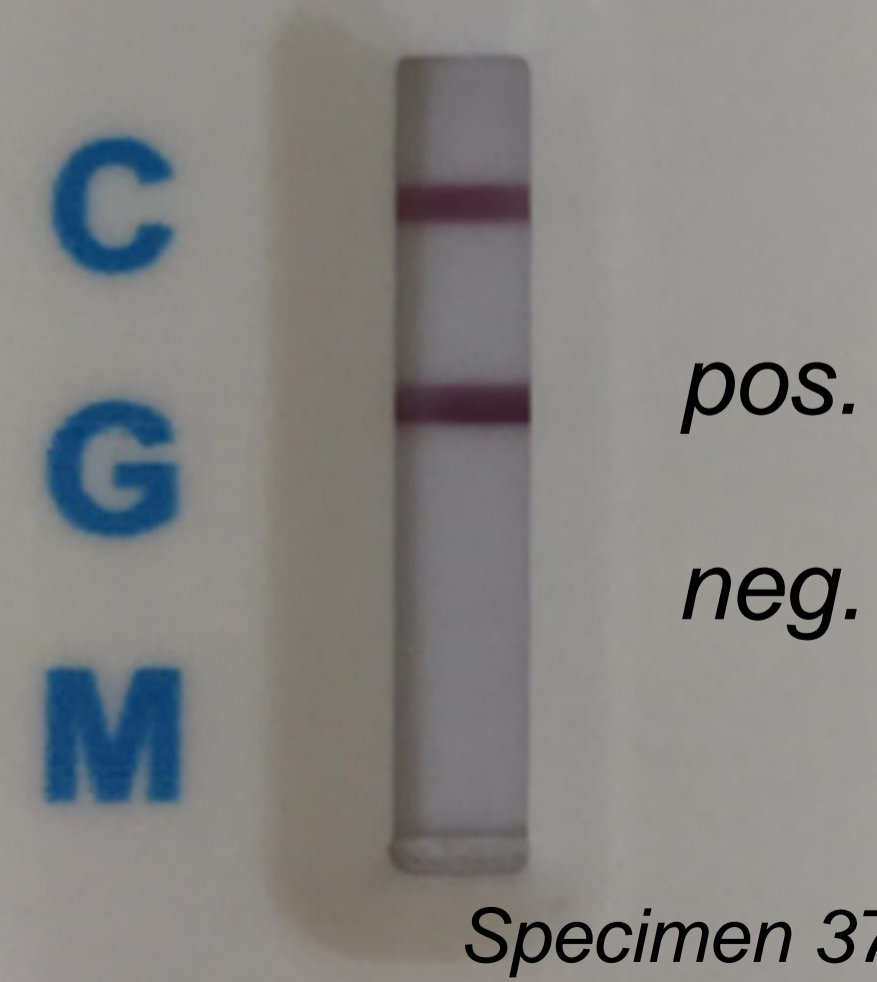

**Patient 18 D34**

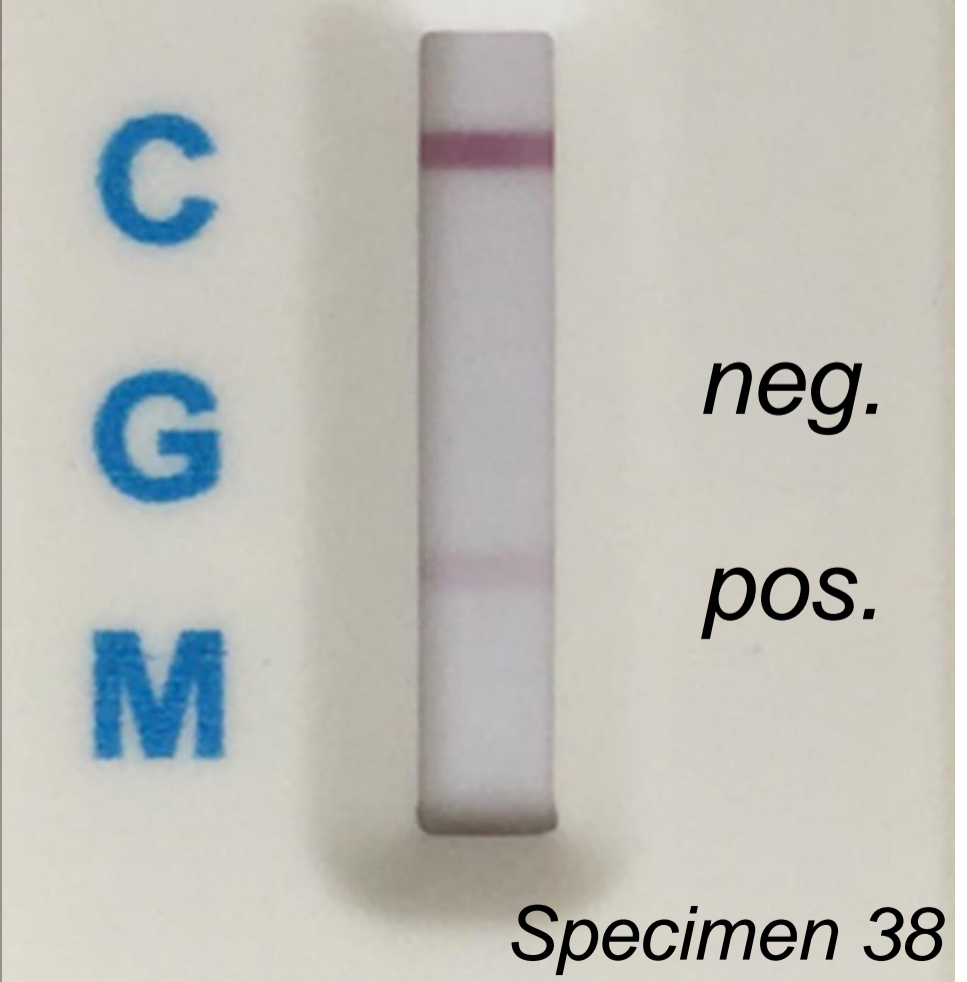

# (c) Mild febrile patients (patient 19 – 28)

Serum

Patient 19 D41

C  
G  
M

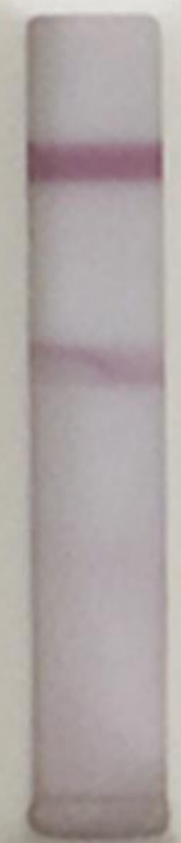

*pos.*  
*v weak.*

Specimen 39

Patient 20 D42

C  
G  
M

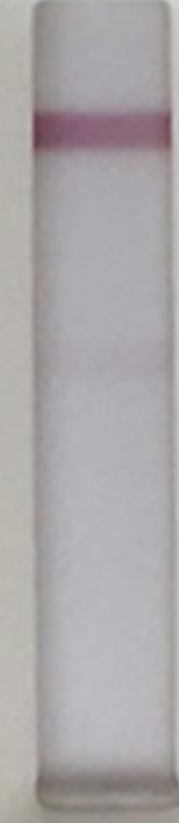

*w pos.*  
*neg.*

Specimen 40

Patient 21 D37

C  
G  
M

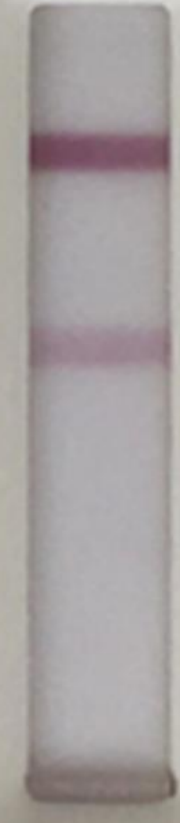

*pos.*  
*neg.*

Specimen 41

Patient 22 D32

C  
G  
M

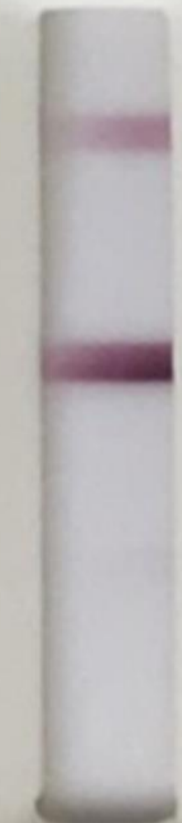

*pos.*  
*v weak.*

Specimen 42

Patient 23 D47

C  
G  
M

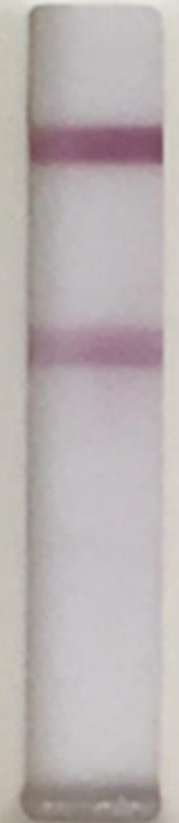

*pos.*  
*neg.*

Specimen 43

Patient 24 D56

C  
G  
M

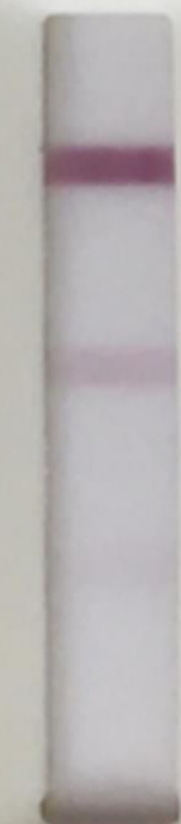

*pos.*  
*v weak.*

Specimen 44

Patient 25 D53

C  
G  
M

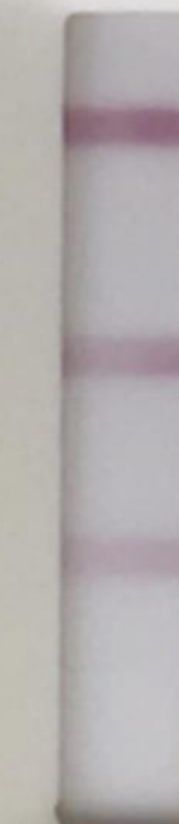

*pos.*  
*pos.*

Specimen 45

Patient 26 D54

C  
G  
M

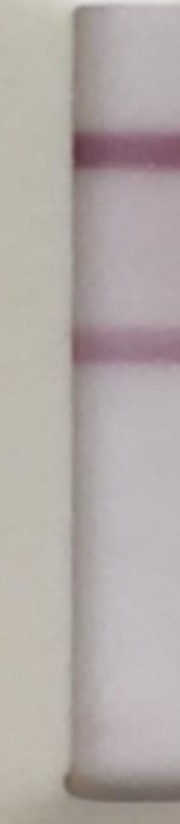

*pos.*  
*neg.*

Specimen 46

Patient 27 D39

C  
G  
M

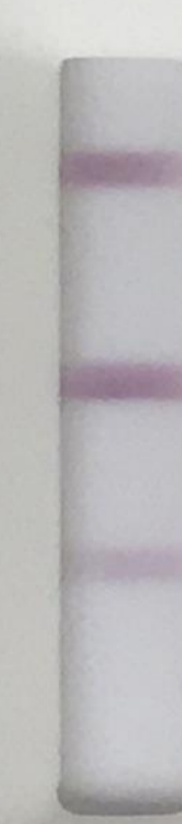

*pos.*  
*pos.*

Specimen 47

Patient 28 D18

C  
G  
M

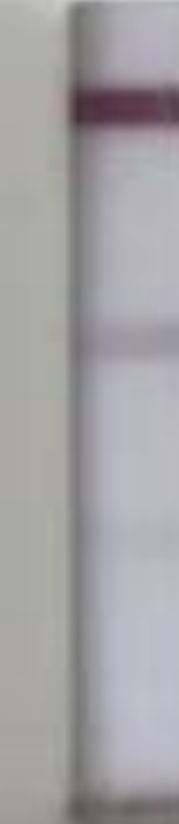

*pos.*  
*v weak.*

Specimen 48

# (c) Mild febrile patients (patient 29)

Serum

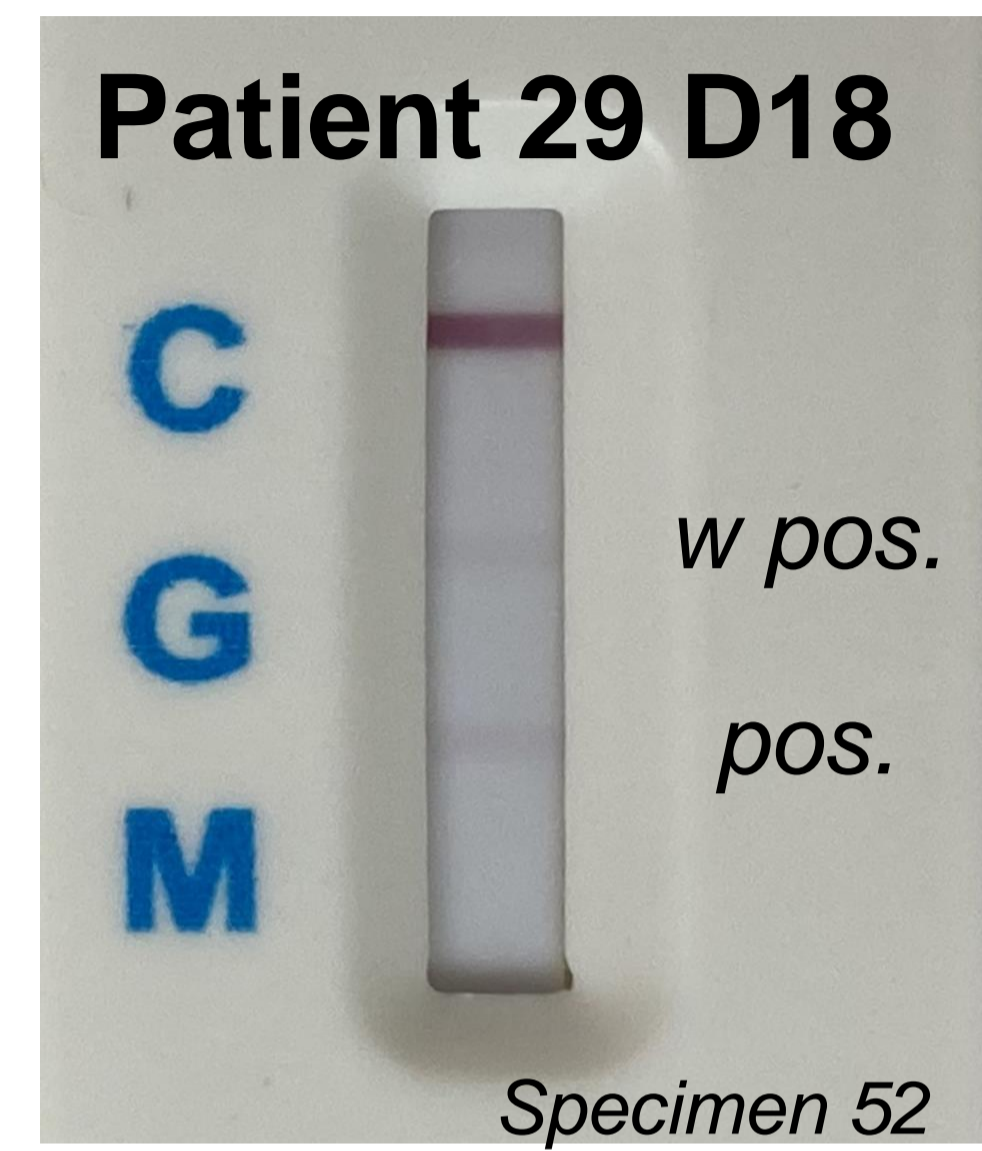

# (d) Ten-fold titrations

## Patient 3 D30

1:1

1:10

1:10<sup>2</sup>

1:10<sup>3</sup>

1:10<sup>4</sup>

1:10<sup>5</sup>

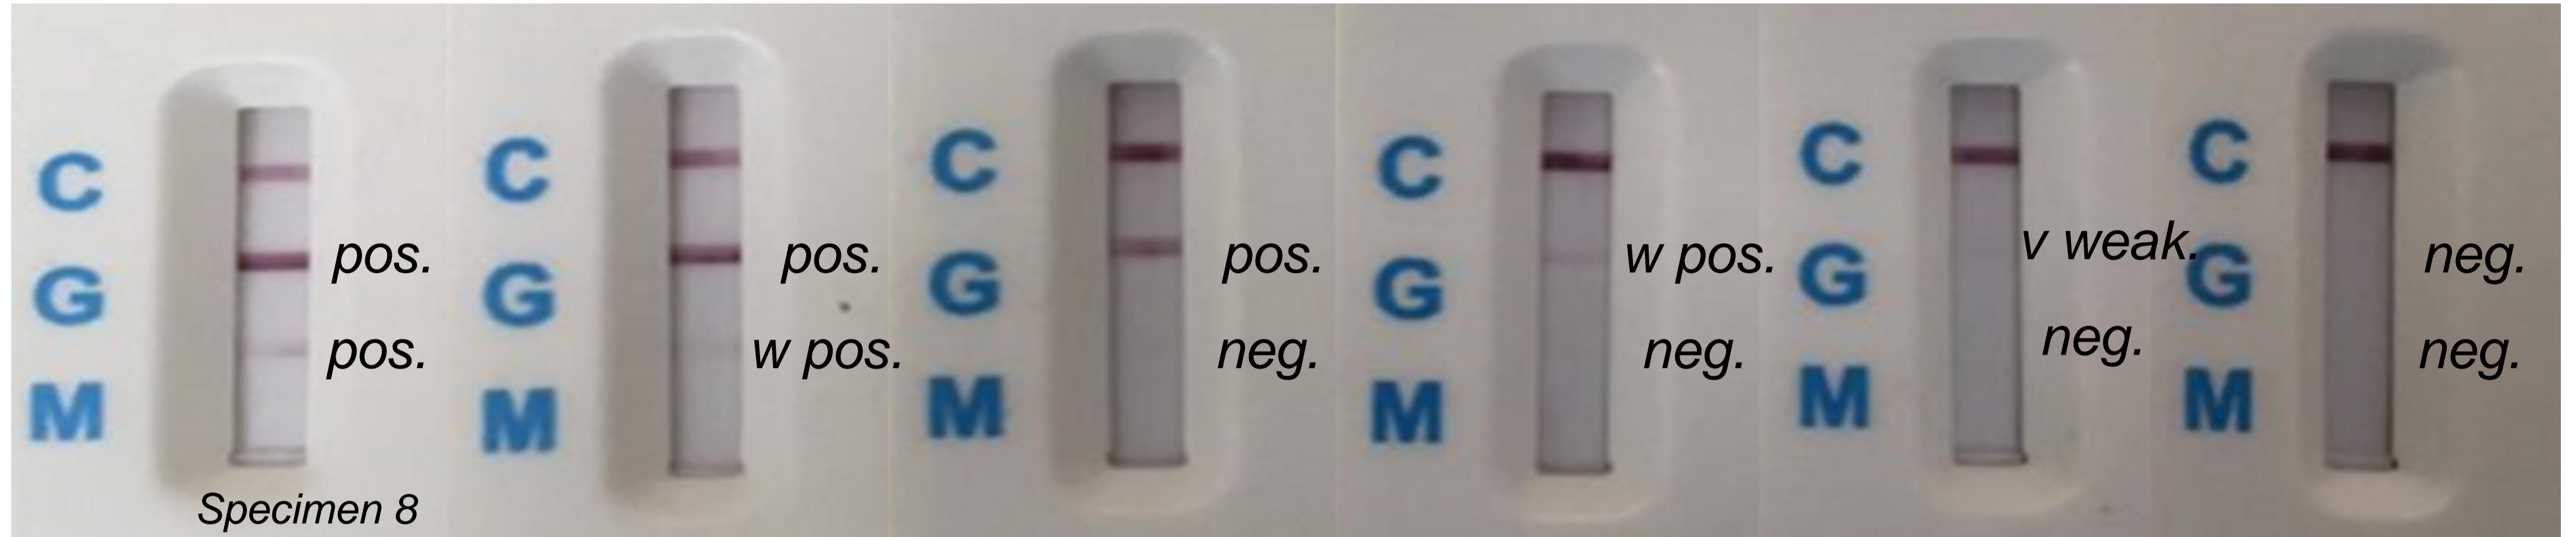

## Patient 4 D42

1:1

1:10

1:10<sup>2</sup>

1:10<sup>3</sup>

1:10<sup>4</sup>

1:10<sup>5</sup>

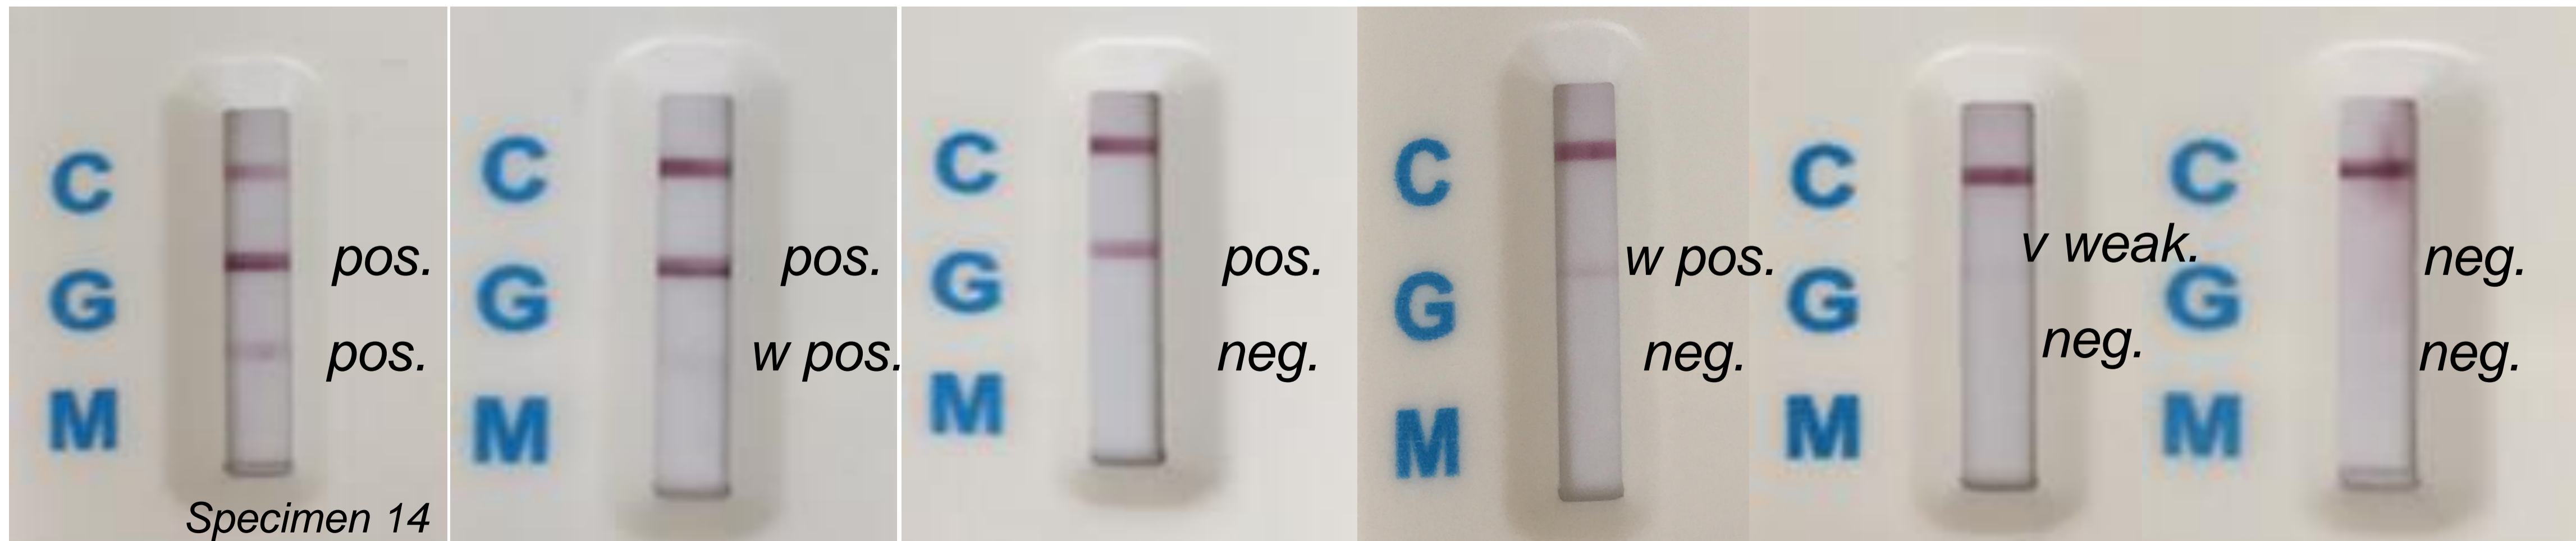

# (d) Ten-fold titrations

## Patient 11 D27

1:1

1:10

1:10<sup>2</sup>

1:10<sup>3</sup>

1:10<sup>4</sup>

1:10<sup>5</sup>

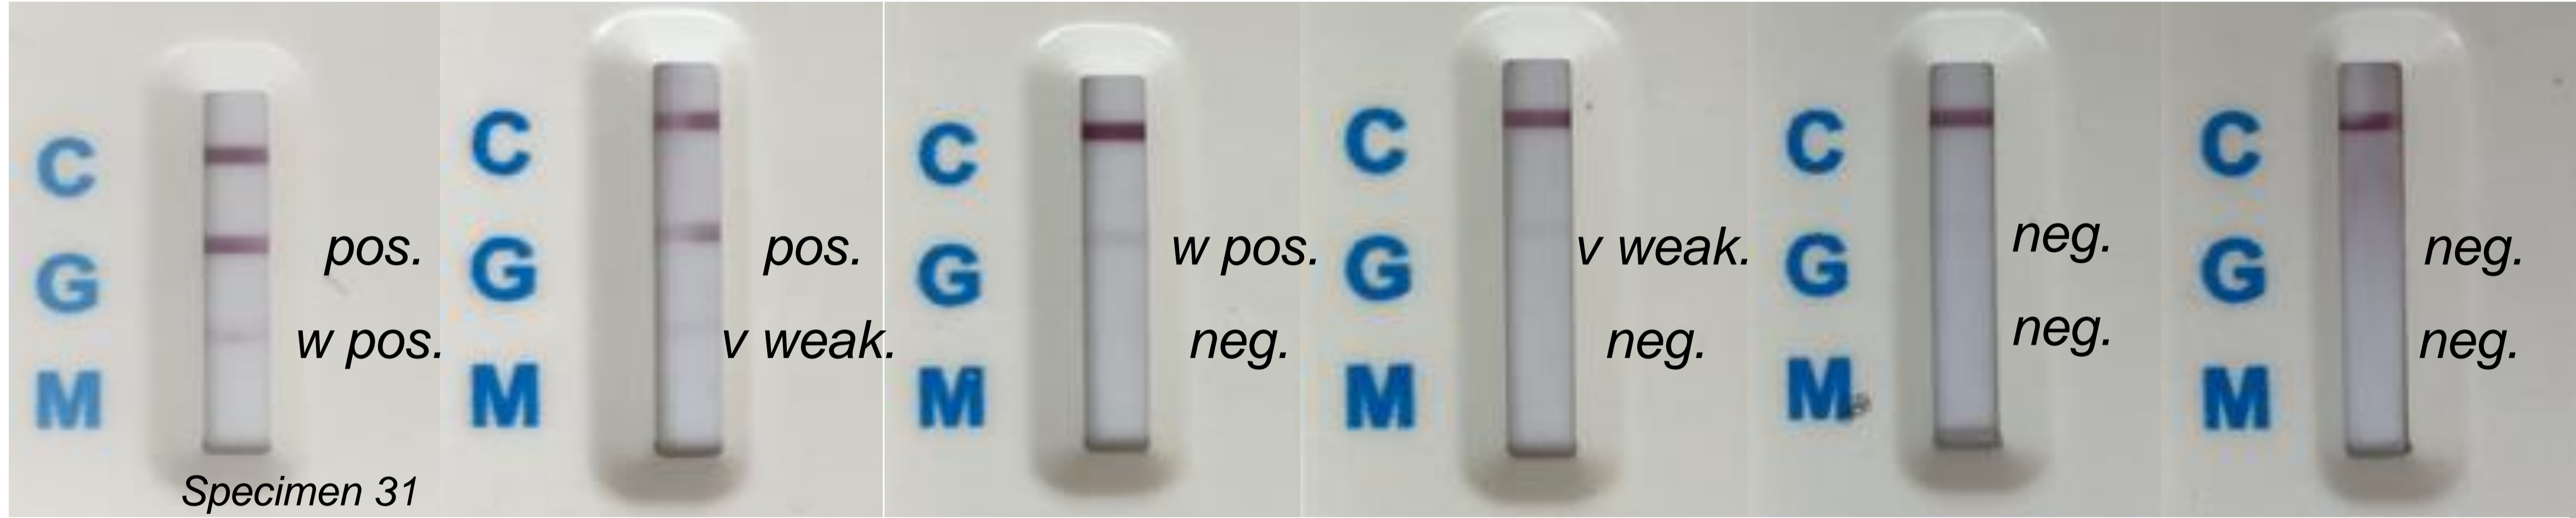

## Patient 13 D35

1:1

1:10

1:10<sup>2</sup>

1:10<sup>3</sup>

1:10<sup>4</sup>

1:10<sup>5</sup>

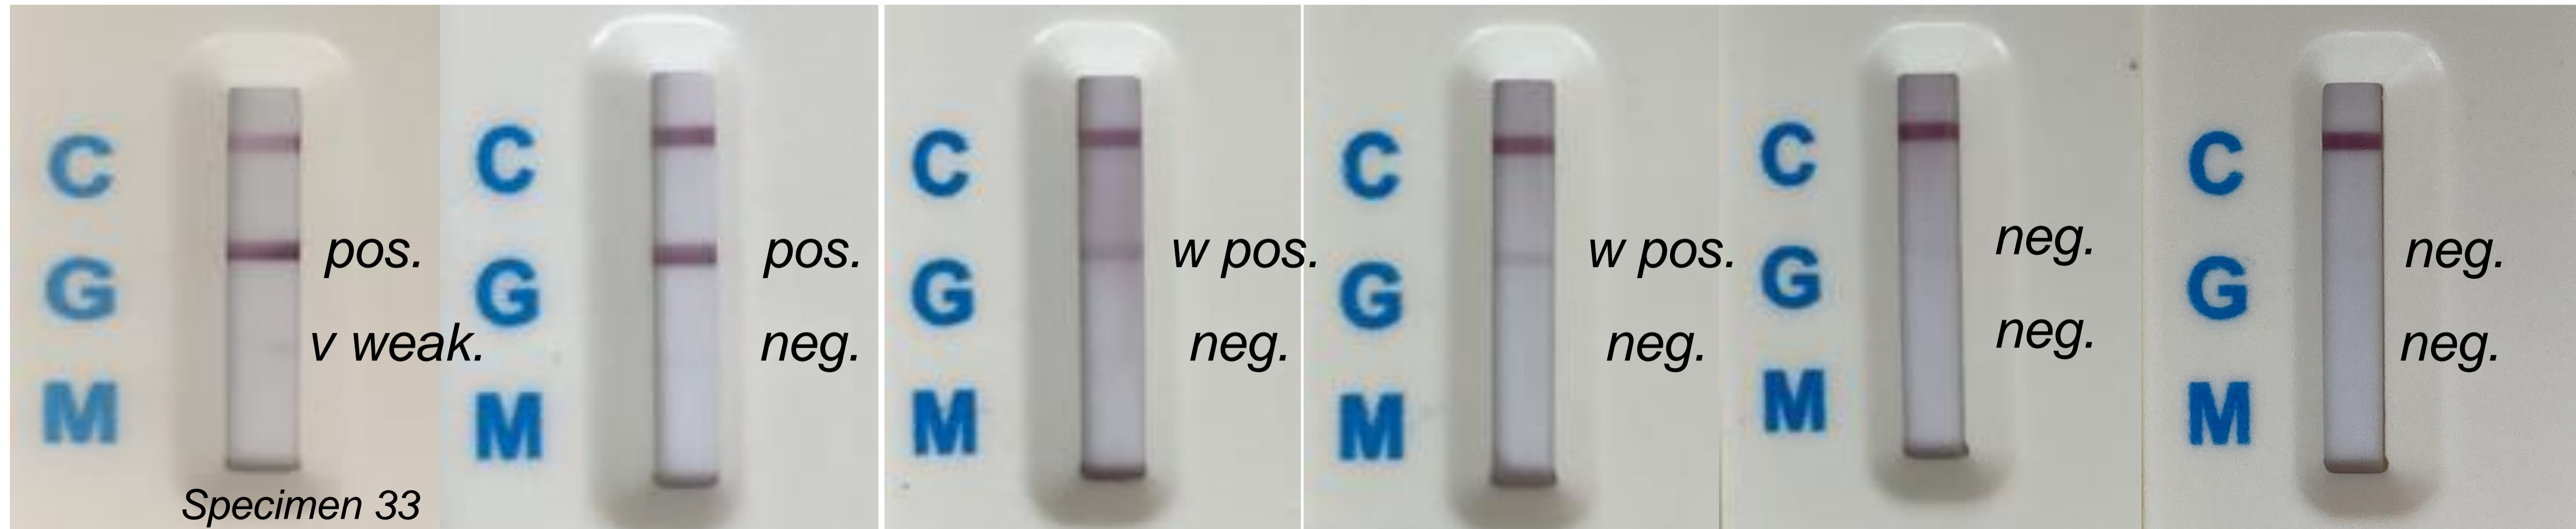

# (d) Ten-fold titrations

## Patient 17 D41

1:1

1:10

1:10<sup>2</sup>

1:10<sup>3</sup>

1:10<sup>4</sup>

1:10<sup>5</sup>

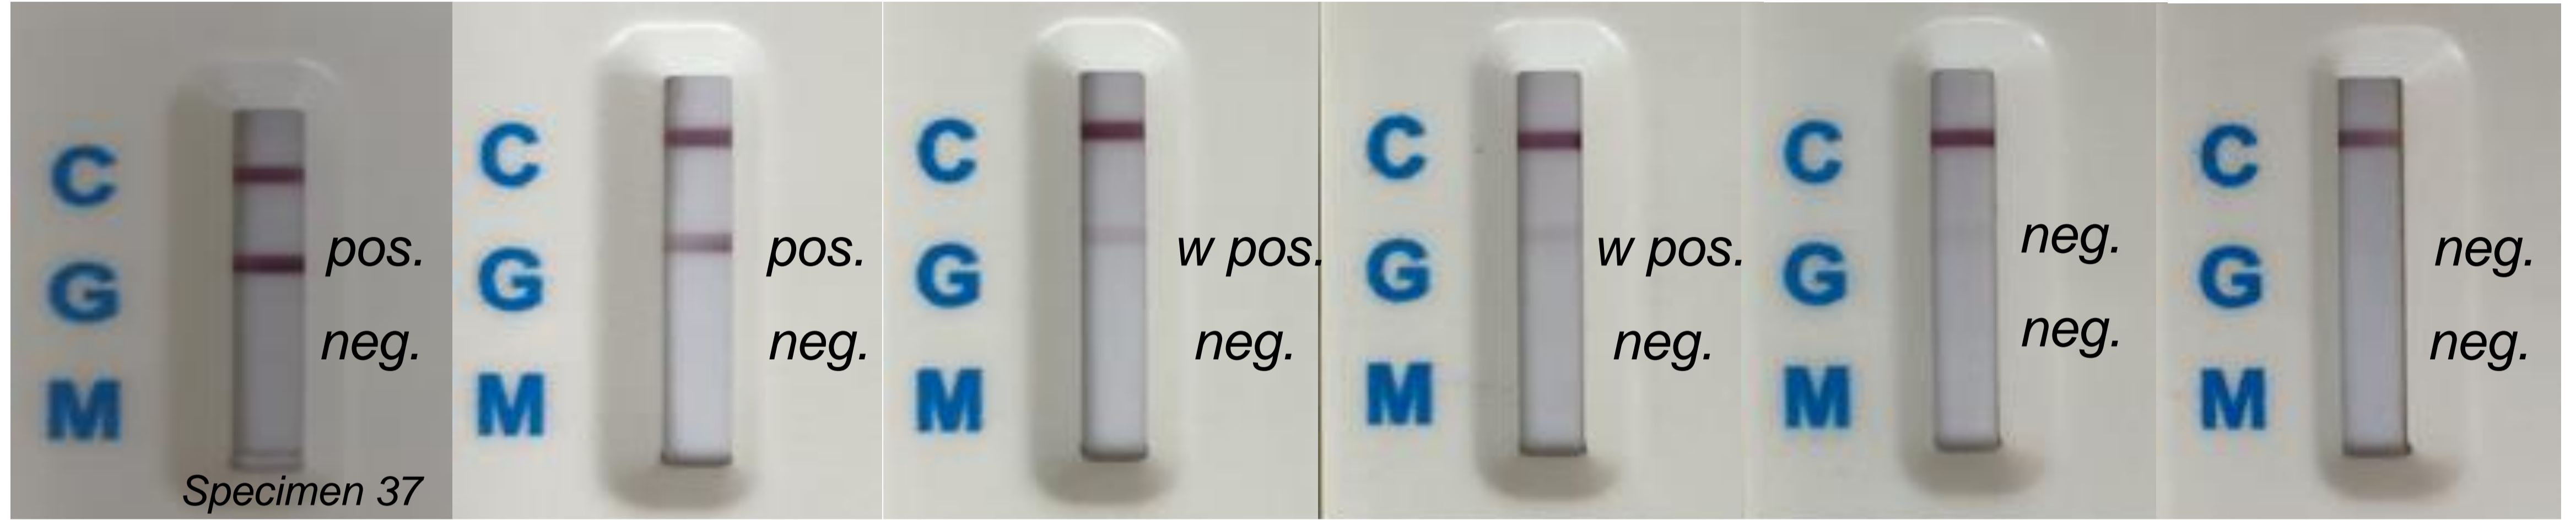

## Patient 27 D39

1:1

1:10

1:10<sup>2</sup>

1:10<sup>3</sup>

1:10<sup>4</sup>

1:10<sup>5</sup>

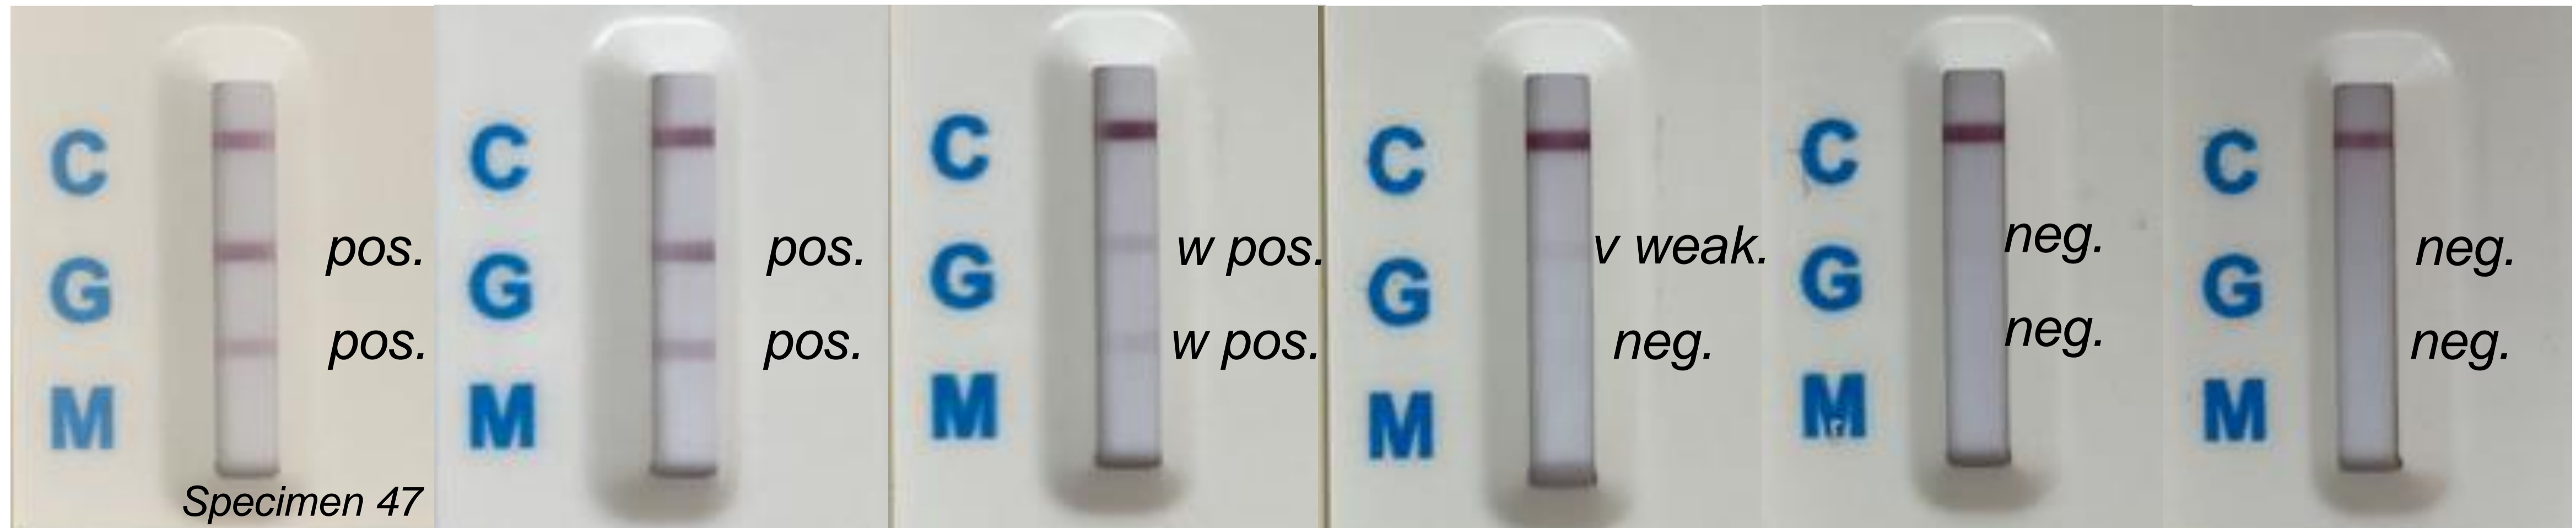



# (d) Ten-fold titrations

Patient 28 D18

1:1

1:10

1:10<sup>2</sup>

1:10<sup>3</sup>

1:10<sup>4</sup>

1:10<sup>5</sup>

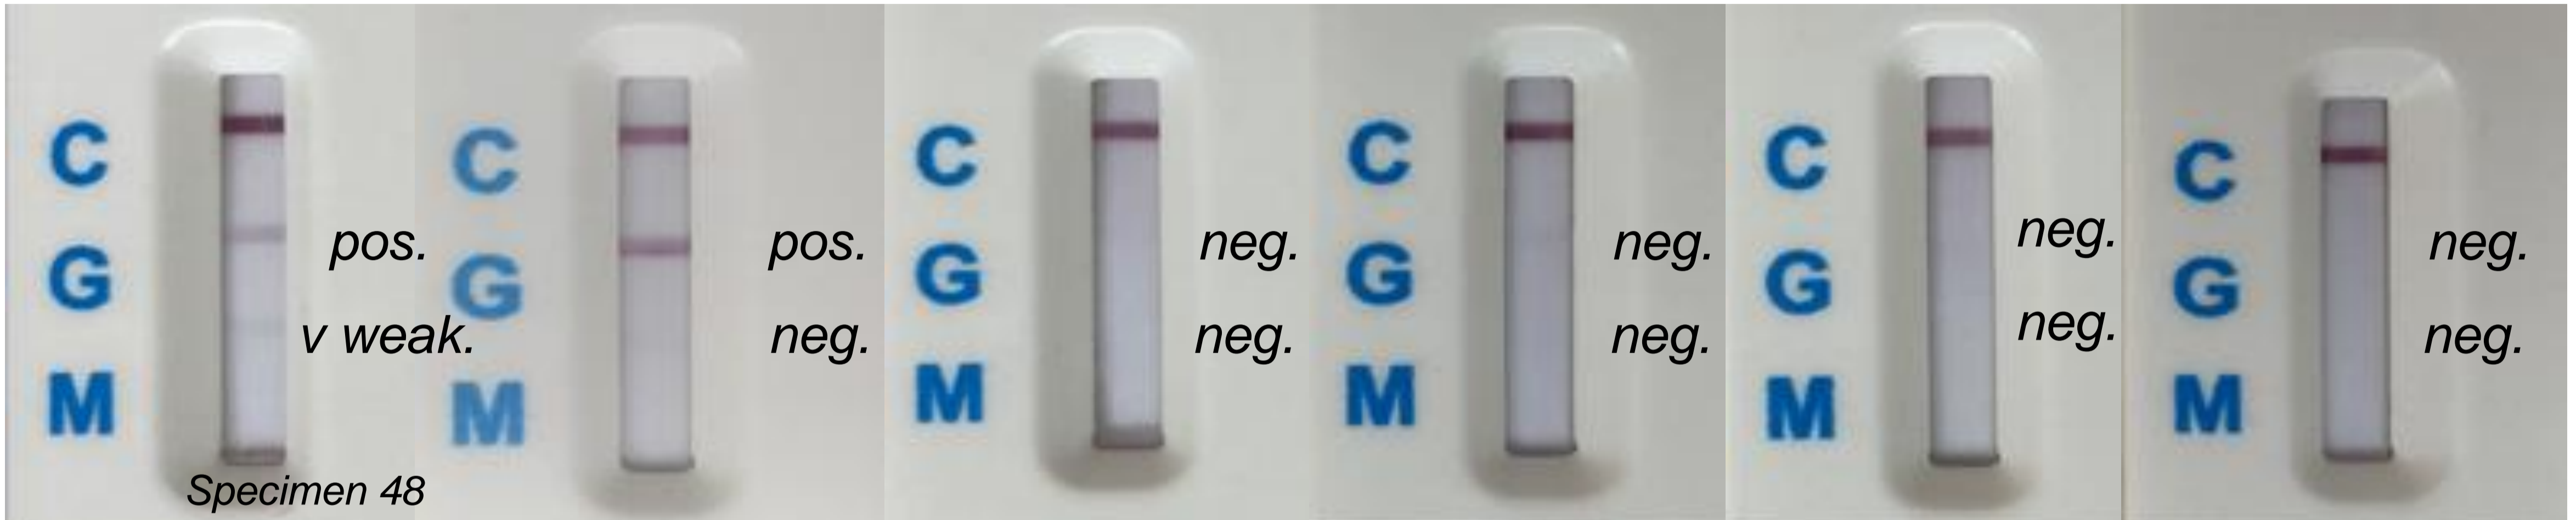

Supplement: mmc2.pdf [file mmc2.pdf]
